# Supplementary material
Source: PubMed Central journal article supplement (PMC3461331)
Supplement: NIHMS397789-supplement-St1.pdf [file NIHMS397789-supplement-St1.pdf]

(A)

| MicroRNAs       | Mean Fold (Allo/Syn) | P Values |
|-----------------|----------------------|----------|
| Heart graft     |                      |          |
| mmu-miR-147     | 13.48                | <0.01    |
| mmu-miR-451     | 13.26                | <0.05    |
| mmu-miR-96      | 12.05                | <0.05    |
| mmu-miR-182     | 6.95                 | <0.01    |
| mmu-miR-467c    | 6.49                 | <0.01    |
| mmu-miR-210     | 6.45                 | <0.01    |
| mmu-miR-183     | 5.71                 | <0.01    |
| mmu-miR-467a    | 5.17                 | <0.01    |
| mmu-miR-467d    | 4.86                 | <0.01    |
| mmu-miR-669a    | 4.76                 | <0.01    |
| mmu-miR-500     | 4.67                 | <0.05    |
| mmu-miR-7a      | 4.34                 | <0.01    |
| mmu-miR-467b    | 4.16                 | <0.01    |
| mmu-miR-142-3p  | 3.43                 | <0.01    |
| mmu-miR-21      | 3.24                 | <0.01    |
| mmu-miR-130b    | 3.10                 | <0.01    |
| mmu-miR-25      | 2.71                 | <0.05    |
| mmu-miR-222     | 2.70                 | <0.05    |
| mmu-miR-18a     | 2.63                 | <0.01    |
| mmu-miR-324-3p  | 2.56                 | <0.05    |
| mmu-miR-15b     | 2.53                 | <0.05    |
| mmu-miR-339-5p  | 2.49                 | <0.05    |
| mmu-miR-652     | 2.45                 | <0.01    |
| mmu-miR-155     | 2.44                 | <0.05    |
| mmu-miR-362-3p  | 2.43                 | <0.05    |
| mmu-miR-200c    | 2.40                 | <0.05    |
| mmu-miR-221     | 2.38                 | <0.01    |
| mmu-miR-324-5p  | 2.28                 | <0.05    |
| mmu-miR-142-5p  | 2.28                 | <0.05    |
| mmu-miR-350     | 2.21                 | <0.01    |
| mmu-miR-10a     | 2.18                 | <0.05    |
| mmu-miR-132     | 1.94                 | <0.05    |
| mmu-miR-674     | 1.87                 | <0.01    |
| mmu-miR-148b    | 1.82                 | <0.05    |
| mmu-miR-744     | 1.74                 | <0.05    |
| mmu-miR-92a     | 1.73                 | <0.05    |
| mmu-miR-361     | 1.72                 | <0.05    |
| mmu-miR-20a     | 1.70                 | <0.01    |
| mmu-miR-532-3p  | 1.61                 | <0.05    |
| mmu-miR-188-5p  | 1.60                 | <0.01    |
| mmu-miR-340-3p  | 1.56                 | <0.01    |
| mmu-miR-301a    | 1.37                 | <0.05    |
| mmu-miR-23b     | 0.72                 | <0.05    |
| mmu-miR-30a     | 0.70                 | <0.05    |
| mmu-miR-26a     | 0.65                 | <0.05    |
| mmu-miR-30b     | 0.64                 | <0.01    |
| mmu-miR-365     | 0.63                 | <0.05    |
| mmu-miR-203     | 0.62                 | <0.05    |
| mmu-miR-34b-3p  | 0.57                 | <0.05    |
| mmu-miR-195     | 0.57                 | <0.05    |
| mmu-miR-434-3p  | 0.57                 | <0.05    |
| mmu-miR-139-5p  | 0.56                 | <0.01    |
| mmu-miR-145     | 0.55                 | <0.01    |
| mmu-miR-30e     | 0.55                 | <0.01    |
| mmu-miR-335-5p  | 0.54                 | <0.05    |
| mmu-miR-193b    | 0.54                 | <0.01    |
| mmu-miR-322     | 0.52                 | <0.01    |
| mmu-miR-30c     | 0.47                 | <0.01    |
| mmu-miR-126-5p  | 0.45                 | <0.01    |
| mmu-miR-208     | 0.42                 | <0.01    |
| mmu-miR-1       | 0.38                 | <0.05    |
| mmu-miR-136     | 0.38                 | <0.05    |
| mmu-miR-126-3p  | 0.36                 | <0.01    |
| mmu-miR-133a    | 0.35                 | <0.01    |
| mmu-miR-224     | 0.34                 | <0.01    |
| mmu-miR-497     | 0.34                 | <0.05    |
| mmu-miR-455     | 0.32                 | <0.01    |
| mmu-miR-199a-3p | 0.31                 | <0.05    |
| mmu-miR-204     | 0.29                 | <0.01    |
| mmu-miR-676     | 0.27                 | <0.01    |
| mmu-miR-208b    | 0.24                 | <0.05    |
| mmu-miR-135b    | 0.18                 | <0.01    |
| mmu-miR-135a    | 0.13                 | <0.01    |
| mmu-miR-302b    | 0.11                 | <0.05    |

(B)

| MicroRNAs                      | Mean Fold (Allo/Syn) | P Values |
|--------------------------------|----------------------|----------|
| Graft infiltrating lymphocytes |                      |          |
| mmu-miR-182                    | 13.69                | <0.01    |
| mmu-miR-449a                   | 9.85                 | <0.01    |
| mmu-miR-467a                   | 8.95                 | <0.05    |
| mmu-miR-7b                     | 8.93                 | <0.01    |
| mmu-miR-18a                    | 8.77                 | <0.01    |
| mmu-miR-7a                     | 8.40                 | <0.01    |
| mmu-miR-685                    | 8.34                 | <0.05    |
| mmu-miR-130b                   | 8.20                 | <0.01    |
| mmu-miR-155                    | 7.15                 | <0.01    |
| mmu-miR-124                    | 6.50                 | <0.05    |
| mmu-miR-142-3p                 | 5.59                 | <0.05    |
| mmu-miR-20b                    | 5.01                 | <0.01    |
| mmu-miR-146a                   | 4.12                 | <0.05    |
| mmu-miR-361                    | 3.87                 | <0.05    |
| mmu-miR-106b                   | 3.76                 | <0.05    |
| mmu-miR-19a                    | 3.67                 | <0.05    |
| mmu-miR-25                     | 3.66                 | <0.01    |
| mmu-miR-20a                    | 3.53                 | <0.05    |
| mmu-miR-92a                    | 3.53                 | <0.01    |
| mmu-miR-185                    | 3.46                 | <0.05    |
| mmu-miR-200c                   | 3.31                 | <0.01    |
| mmu-miR-148b                   | 3.08                 | <0.01    |
| mmu-miR-183                    | 3.04                 | <0.05    |
| mmu-miR-181a                   | 2.97                 | <0.05    |
| mmu-miR-15b                    | 2.96                 | <0.01    |
| mmu-miR-19b                    | 2.92                 | <0.05    |
| mmu-miR-17                     | 2.88                 | <0.01    |
| mmu-miR-342-3p                 | 2.75                 | <0.05    |
| mmu-miR-106a                   | 2.75                 | <0.01    |
| mmu-miR-301b                   | 2.71                 | <0.05    |
| mmu-miR-194                    | 2.65                 | <0.05    |
| mmu-miR-150                    | 2.59                 | <0.01    |
| mmu-let-7g                     | 2.35                 | <0.05    |
| mmu-miR-93                     | 2.17                 | <0.05    |
| mmu-miR-16                     | 2.16                 | <0.01    |
| mmu-miR-191                    | 1.76                 | <0.05    |
| mmu-miR-31                     | 0.45                 | <0.05    |
| mmu-miR-337-5p                 | 0.40                 | <0.05    |
| mmu-miR-410                    | 0.39                 | <0.05    |
| mmu-miR-379                    | 0.38                 | <0.05    |
| mmu-miR-127                    | 0.33                 | <0.05    |
| mmu-miR-376a                   | 0.31                 | <0.05    |
| mmu-miR-434-3p                 | 0.28                 | <0.05    |
| mmu-miR-214                    | 0.21                 | <0.05    |
