# Supplementary material
Source: PubMed Central journal article supplement (PMC3461331)
Supplement: NIHMS397789-supplement-St2.pdf [file NIHMS397789-supplement-St2.pdf]

| miRNAs      | Mouse heart grafts |                 | Human renal grafts |                 |
|-------------|--------------------|-----------------|--------------------|-----------------|
|             | Fold Change        | <i>P</i> Values | Fold Change        | <i>P</i> Values |
| miR-21      | 3.24               | <0.01           | 3.45               | <0.05           |
| miR-26a     | 0.65               | <0.05           | 0.49               | <0.05           |
| miR-30a     | 0.7                | <0.05           | 0.44               | <0.05           |
| miR-30b     | 0.64               | <0.01           | 0.4                | <0.01           |
| miR-30c     | 0.47               | <0.01           | 0.31               | <0.01           |
| miR-30e     | 0.55               | <0.01           | 0.43               | <0.05           |
| miR-126-5p  | 0.45               | <0.01           | 0.35               | <0.05           |
| miR-126-3p  | 0.36               | <0.01           | 0.48               | <0.05           |
| miR-142-3p  | 3.43               | <0.01           | 16.61              | <0.01           |
| miR-142-5p  | 2.28               | <0.05           | 18.48              | <0.01           |
| miR-155     | 2.44               | <0.05           | 14.53              | <0.01           |
| miR-193b    | 0.54               | <0.01           | 0.24               | <0.05           |
| miR-195     | 0.57               | <0.05           | 0.48               | <0.05           |
| miR-199a-3p | 0.31               | <0.05           | 0.4                | <0.05           |
| miR-203     | 0.62               | <0.05           | 0.43               | <0.05           |
| miR-204     | 0.29               | <0.01           | 0.43               | <0.05           |
| miR-365     | 0.63               | <0.05           | 0.55               | <0.05           |
| miR-497     | 0.34               | <0.05           | 0.51               | <0.05           |
